# Supplementary material for: An electrochemical sensor based on a MOF/ZnO composite for the highly sensitive detection of Cu(ii) in river water samples
Source: Royal Society of Chemistry journal article supplement (doi:10.1039/d1ra08376g), 2022-01-01
Supplement: d1ra08376g1.pdf [file d1ra08376g1.pdf]

## Supporting Information

### **An Electrochemical Sensor on the MOF/ZnO Composite for Highly Sensitive Detection of Cu (II) in river Water Sample**

Zhenshan Li <sup>1</sup>, Qi Li <sup>1</sup>, Rong Jiang <sup>1</sup>, Yan Qin <sup>1</sup>, Yan Luo <sup>1</sup>, Jinsong Li <sup>2</sup>, Wei Kong <sup>2</sup>, Zhiguo Yang <sup>2</sup>, Chao Huang <sup>2</sup>, Xin Qu <sup>2</sup>, Tao Wang <sup>2</sup>, Lin Cui <sup>1</sup>, Gang Wang <sup>1,\*</sup>, Shengchao Yang <sup>1,2,\*</sup>, Zhiyong Liu <sup>1,\*</sup>, Xuhong Guo <sup>1,3</sup>

<sup>1</sup> *School of Chemistry and Chemical Engineering, Shihezi University/ Key Laboratory of Green Process for Chemical Engineering / Key Laboratory for Chemical Materials of Xinjiang Uygur Autonomous Region / Engineering Center for Chemical Materials of Xinjiang Bingtuan, Shihezi University, Xinjiang, Shihezi 832003, China.*

<sup>2</sup> *Tianfu Energy Co., Ltd, City Key Laboratory of Energy Conservation and Environmental Protection, Xinjiang, 832000, China.*

<sup>3</sup> *State Key Laboratory of Chemical Engineering, East China University of Science and Technology, Shanghai 200237, P. R. China.*

\* Corresponding author: Gang Wang, Zhiyong Liu, Shengchao Yang.

Address: Beisi Road, Shihezi City, Xinjiang, 832003, P. R. China.

Tel: 0086-0993-2057276.

E-mail                      Address:                      [wanggang@shzu.edu.cn](mailto:wanggang@shzu.edu.cn)(Gang                      Wang),  
[lzyongclin@sina.com](mailto:lzyongclin@sina.com)(Zhiyong                      Liu),                      [shengchao.yang@shzu.edu.cn](mailto:shengchao.yang@shzu.edu.cn) (Shengchao  
Yang).

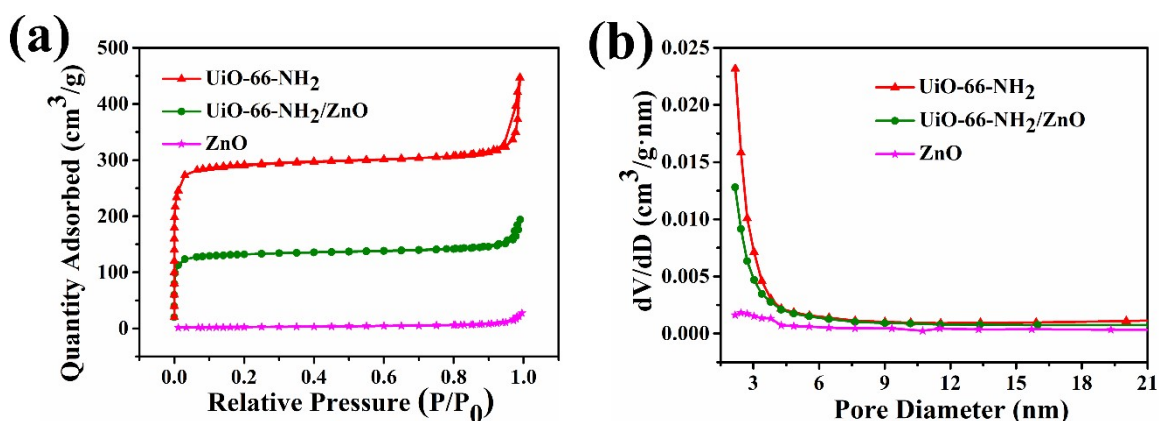

**Fig. S1.** (a) N<sub>2</sub> adsorption–desorption isotherms of UiO-66-NH<sub>2</sub>, ZnO and UiO-66-NH<sub>2</sub>/ZnO (b) pore size distributions of UiO-66-NH<sub>2</sub>, ZnO and UiO-66-NH<sub>2</sub>/ZnO.

Table S1 BET surface areas and pore volumes of UiO-66-NH<sub>2</sub>, ZnO and UiO-66-NH<sub>2</sub>/ZnO

| Samples                     | Specific surface area (m <sup>2</sup> ·g <sup>-1</sup> ) | Pore volume (cm <sup>3</sup> ·g <sup>-1</sup> ) |
|-----------------------------|----------------------------------------------------------|-------------------------------------------------|
| UiO-66-NH <sub>2</sub>      | 933.2075                                                 | 0.6914                                          |
| ZnO                         | 9.4848                                                   | 0.0425                                          |
| UiO-66-NH <sub>2</sub> /ZnO | 433.4271                                                 | 0.3004                                          |

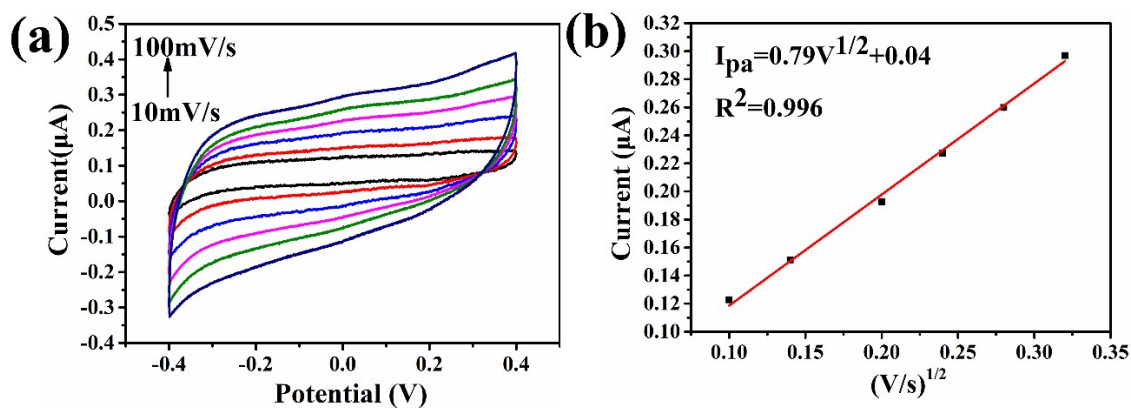

**Figure S2.** CV curves of 3.0 μM Cu(II) for bare GCE in 0.1 M HAc-NaAc solution (pH = 5.0) at different scan rates: 10-100 mV/s. (b) Plots of linear relationship between the anodic peak currents (I<sub>pa</sub>) and the square root of scan (V<sup>1/2</sup>).

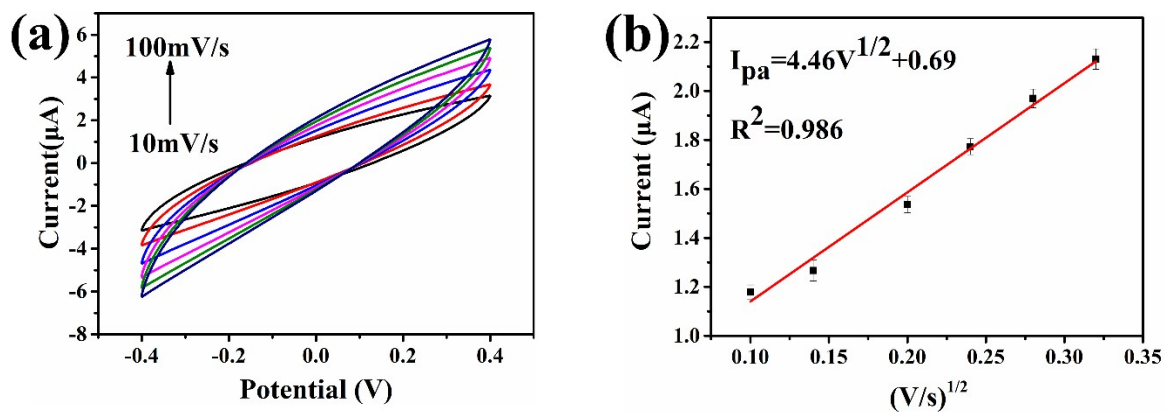

**Figure S3.** CV curves of 3.0  $\mu\text{M}$  Cu(II) for UiO-66-NH<sub>2</sub>/GCE in 0.1 M HAc-NaAc solution (pH = 5.0) at different scan rates: 10-100 mV/s. (b) Plots of linear relationship between the anodic peak currents ( $I_{pa}$ ) and the square root of scan ( $V^{1/2}$ ).

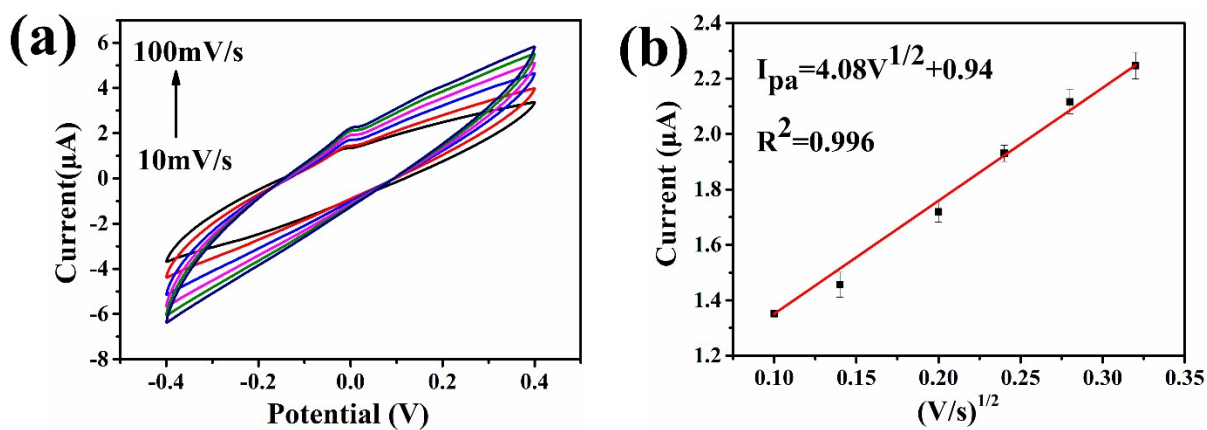

**Figure S4.** CV curves of 3.0  $\mu\text{M}$  Cu(II) for ZnO/GCE in 0.1 M HAc-NaAc solution (pH = 5.0) at different scan rates: 10-100 mV/s. (b) Plots of linear relationship between the anodic peak currents ( $I_{pa}$ ) and the square root of scan ( $V^{1/2}$ ).
